# Supplementary material
Source: publisher figshare collection journal article supplement (https://acs.figshare.com/ndownloader/files/22178298)
Supplement: Supplementary file 1 [file 22178298]

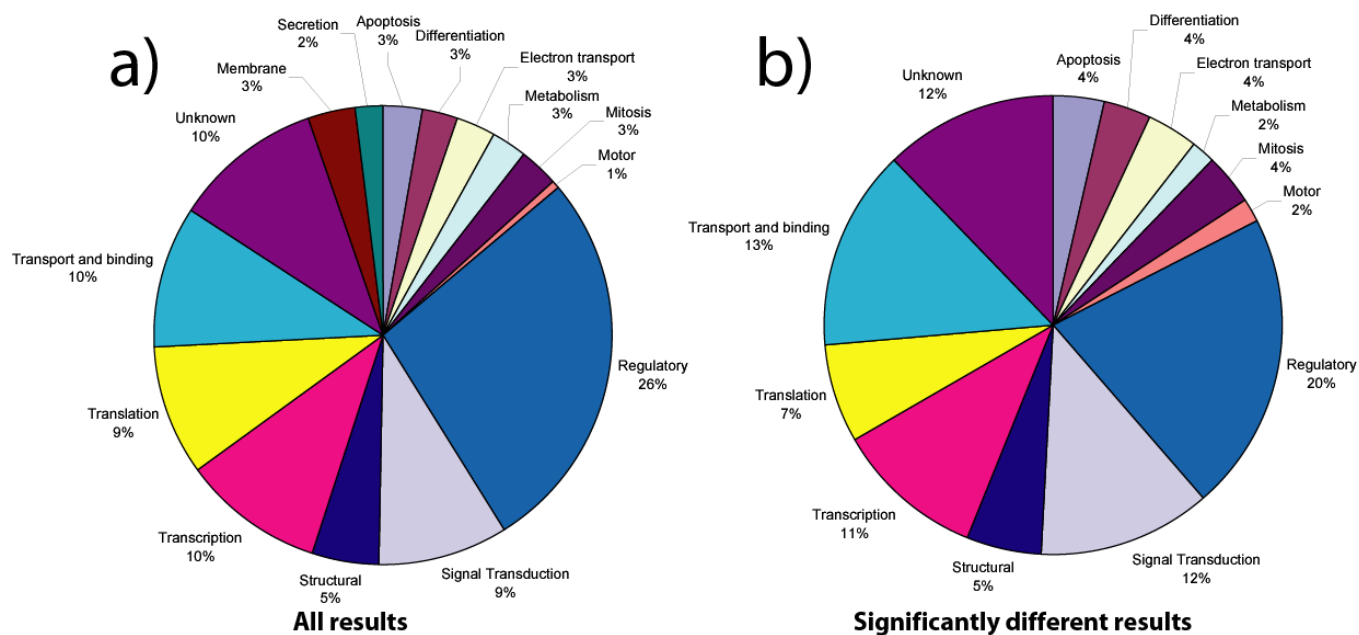

Supplementary Figure S1: Functional classification of proteins based on GO ontology

(<http://www.geneontology.org/>) and displayed as a fraction of all identified proteins; a) all 151 proteins identified and b) only considering the 56 proteins that contained a phosphopeptide that had altered abundance following RA treatment.
